# Supplementary material
Source: PubMed Central journal article supplement (PMC3294375)
Supplement: NIHMS358069-supplement-1_si_001.pdf [file NIHMS358069-supplement-1_si_001.pdf]

**THE ROLE OF CALCIUM IN METALLOENZYME: EFFECTS OF CALCIUM  
REMOVAL ON THE AXIAL LIGATION GEOMETRY AND MAGNETIC  
PROPERTIES OF THE CATALYTIC DIHEME CENTER IN MauG**

Yan Chen,<sup>†</sup> Sunil G. Naik,<sup>†</sup> J. Krzystek,<sup>§</sup> Sooim Shin,<sup>¶</sup> William H. Nelson,<sup>‡¶</sup> Shenghui Xue,<sup>&</sup>  
Jenny. J. Yang,<sup>†&</sup> Victor L. Davidson,<sup>¶</sup> and Aimin Liu<sup>\*†</sup>

<sup>†</sup>Departments of Chemistry, &Biology, <sup>‡</sup>Physics and Astronomy, Molecular Basis of Disease Program, Georgia State University, P.O. Box 4098, Atlanta, GA 30303; <sup>¶</sup> Burnett School of Biomedical Sciences, College of Medicine, University of Central Florida, Orlando, FL 32827, and <sup>§</sup>National High Magnetic Field Laboratory, Florida State University, Tallahassee, FL 32310

**Figure S1.** The weight-normalized NMR signal amplitude of native (fitted with black traces) and Ca<sup>2+</sup>-depleted (fitted with red traces) MauG as a function of time. The relaxivity  $T_1$  and  $T_2$  values were obtained from the fitting of these data. The  $r_1$  and  $r_2$  values were calculated from the  $T_1$  and  $T_2$  values according to eqs. 2 and 3 as described in the text.

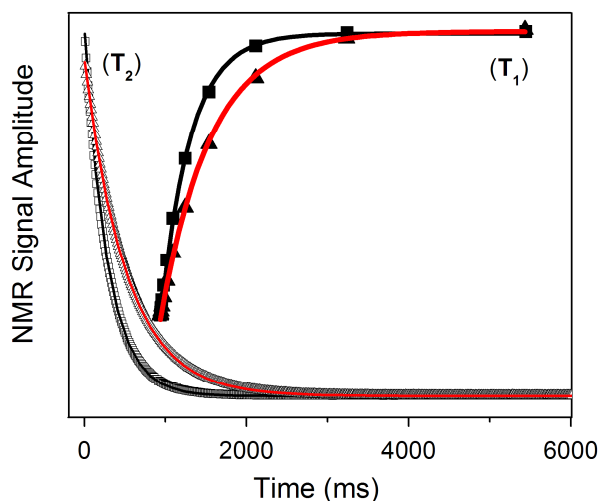

### Further Details of the Proton NMR Relaxometry Study

According to the accepted modified equations of Solomon<sup>1</sup> and Bloembergen.<sup>2</sup>

$$\frac{1}{T_1} = \frac{[M]}{55.5} \frac{n}{T_{1m} + \tau_m} \quad (\text{S1})$$

$$\frac{1}{T_2} = \frac{[M]}{55.5} \frac{n}{T_{2m} + \tau_m} \quad (\text{S2})$$

Where  $n$  is the water molecules in the first coordination sphere of the paramagnetic ion of the molarity  $m$ ,  $T_{1m}$  and  $T_{2m}$  are the longitudinal and the transverse relaxation times of bonded protons and  $\tau_m$  is the residence time of bonded water. According to equation 1 and 2, the relaxivity of MauG could be influenced by the number of water molecular in the first coordination sphere of ion ( $n$ ). The  $\text{Ca}^{2+}$  ion in MauG is surrounded by 4 water molecules. The removal of  $\text{Ca}^{2+}$  from MauG could potentially decrease number of water molecular in the first sphere of ion. When  $n$  decrease, both of longitudinal and transverse relaxivity of MauG decrease. Besides, the change of  $T_{1m}$  and  $T_{2m}$  also influences the relaxivity of MauG. The  $T_{1m}$  and  $T_{2m}$  can be determined by equation S3-S5.

$$\frac{1}{T_{1m}} = \frac{2}{15} C \left[ \frac{7\tau_{c2}}{1 + \omega_s^2 \tau_{c2}^2} + \frac{3\tau_{c1}}{1 + \omega_l^2 \tau_{c1}^2} \right] + \frac{2}{3} \left( \frac{A}{\hbar} \right)^2 S(S+1) \frac{\tau_{e2}}{1 + \omega_s^2 \tau_{e2}^2} \quad (\text{S3})$$

$$\frac{1}{T_{2m}} = \frac{C}{15} \left[ 4\tau_{c1} + \frac{13\tau_{c2}}{1 + \omega_s^2 \tau_{c2}^2} + \frac{3\tau_{c1}}{1 + \omega_l^2 \tau_{c1}^2} \right] + \frac{1}{3} \left( \frac{A}{\hbar} \right)^2 S(S+1) \left( \tau_{e1} + \frac{\tau_{e2}}{1 + \omega_s^2 \tau_{e2}^2} \right) \quad (\text{S4})$$

$$C = \gamma_l^2 g_e^2 \mu_B^2 S(S+1) (r^{-6}) \quad (\text{S5})$$

Where  $\omega_l$  and  $\omega_s$  are the nuclear and electron larmor precession frequencies, respectively.  $S$  is the total electron spin.  $A/\hbar$  is the electron-nuclear hyperfine coupling constant.  $\tau_c$  and  $\tau_e$  are the correlation times for dipolar and spin exchange interactions respectively.  $\gamma_l$  is the nuclear gyromagnetic ratio.  $g_e$  is the spectroscopic splitting factor.  $\mu_B$  is Bohr magneton,  $r$  is the proton-metal distance. EPR/ Mössbauer data indicate that when  $\text{Ca}^{2+}$  ion was removed from MauG, spin quantum number of high-spin heme decreased from 5/2 to 1/2. According to equation S3-S5, the decrease of  $S$  increases both  $T_{1m}$  and  $T_{2m}$ . As shown in equation S1 and S2, the increase of  $T_{1m}$  and  $T_{2m}$  causes decrease of the longitudinal and transverse relaxivity ( $1/T_1$  and  $1/T_2$ ), respectively.

## References

- (1) Solomon, I. *Phys. Rev.* **1955**, 99.
- (2) Bloembergen, N. *J. Chem. Phys.* **1957**, 27.
